# Supplementary material for: Aqueous synthesis of Mn-doped CuInSe2 quantum dots to enhance the performance of quantum dot sensitized solar cells
Source: Royal Society of Chemistry journal article supplement (doi:10.1039/c9dt03163d), 2019-01-01
Supplement: c9dt03163d1.pdf [file c9dt03163d1.pdf]

## Supporting Information

# Aqueous synthesis of Mn-doped CuInSe<sub>2</sub> quantum dots to enhance the performance of quantum dot sensitized solar cells

Mulu Alemayehu Abate,<sup>a</sup> Khalilalrahman Dehvari,<sup>a</sup> Jia-Yaw Chang<sup>ab\*</sup>, Keiko Waki<sup>c</sup>

- a. Department of Chemical Engineering, National Taiwan University of Science and Technology, Taipei, 10607, Taiwan, Republic of China
- b. Taiwan Building Technology Center, National Taiwan University of Science and Technology, Taipei, 10607, Taiwan, Republic of China
- c. Department of Chemical Science and Engineering, School of Materials and Chemical Technology, Tokyo Institute of Technology, 4259 Nagatsuta-cho, Midori-ku, Yokohama-shi 226-8502, Japan

\*Corresponding author: Jia-Yaw Chang

Department of Chemical Engineering, National Taiwan University of Science and Technology,  
43, Section 4, Keelung Road, Taipei, 10607, Taiwan, Republic of China

E-mail: [jychang@mail.ntust.edu.tw](mailto:jychang@mail.ntust.edu.tw)

Tel.: +886-2-27303636.

Fax: +886-2-27376644.

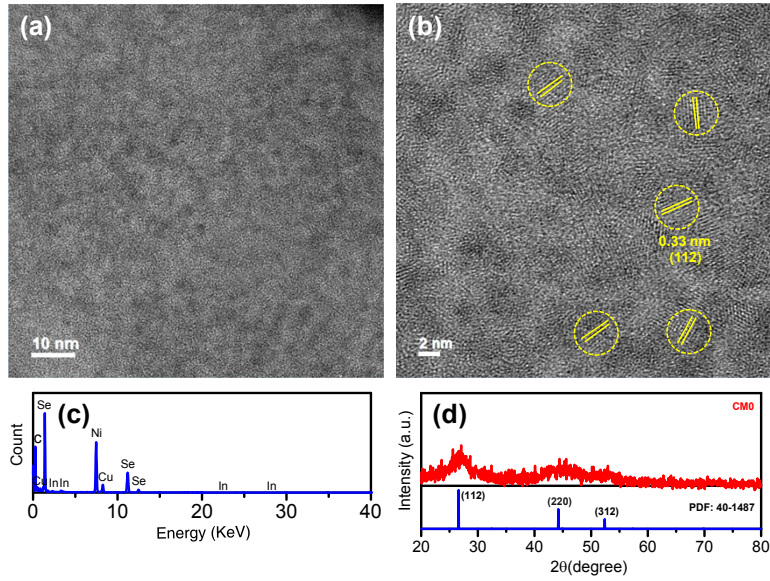

**Figure S1.** (a) Representative TEM image, (b) high-resolution TEM image, and (c) EDS analysis of CM0 QDs. The C and Ni signals in the spectrum come from the nickel TEM grid used in the measurements. (d) XRD pattern of CM0 QDs. The vertical lines are the reference XRD pattern of tetragonal C1Se (JCPDS 40-1487).

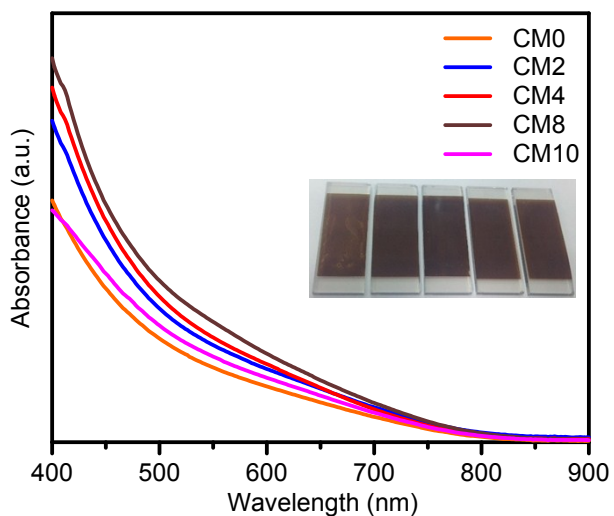

**Figure S2.** UV–Vis absorption spectra of CM0, CM2, CM4, CM8, and CM10 QDs sensitized on TiO<sub>2</sub> with respect to FTO glass. (The inset photographs, from left to right, indicate the CM0, CM2, CM4, CM8, and CM10 QDs sensitized-TiO<sub>2</sub> electrodes on the FTO glass substrate).

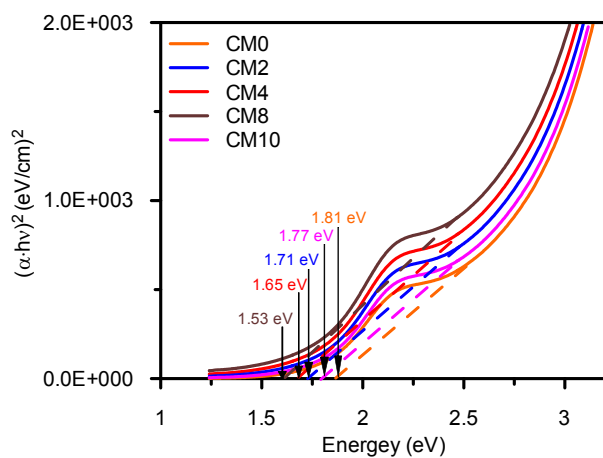

**Figure S3.**  $(\alpha \cdot h\nu)^2$  (eV<sup>2</sup>) plot for the determination of band gap for CM0, CM2, CM4, CM8, and CM10 QDs.

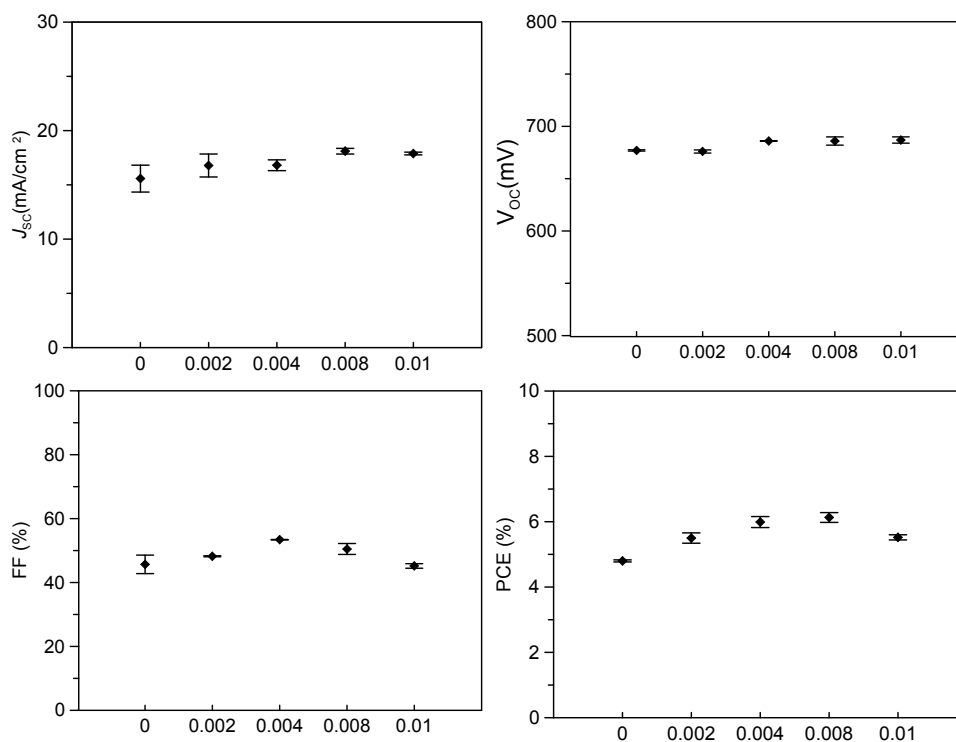

**Figure S4.** Summary of photovoltaic performance of CM0, CM2, CM4, CM8, and CM10 QDs. Error bars represent the mean standard deviation of five independent experiments.

**Table S1.** ICP elemental analyses of cations for the samples CM0, CM2, CM4, CM8, and CM10 QDs.

| Samples | Mn (mM/mL) | Cu (mM/mL) | In (mM/mL) |
|---------|------------|------------|------------|
| CM0     | 0.0000     | 4.705      | 24.547     |
| CM2     | 0.0003     | 5.090      | 25.460     |
| CM4     | 0.0027     | 5.040      | 25.540     |
| CM8     | 0.0043     | 4.720      | 23.560     |
| CM10    | 0.0066     | 4.660      | 23.880     |
